# Supplementary material for: Promoter DNA Hypermethylation and Gene Repression in Undifferentiated Arabidopsis Cells
Source: PubMed Central journal article supplement (PMC2556100; doi:10.1371/journal.pone.0003306), 2008-10-01

Figure S4

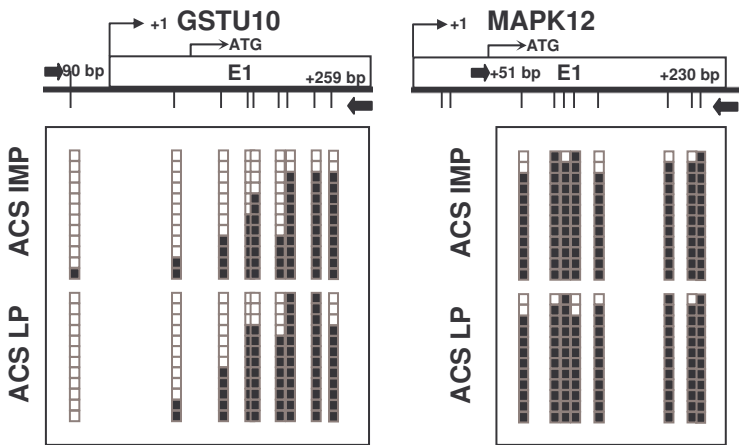

Supplement: pone.0003306.s004.pdf [file pone.0003306.s004.pdf]
