# Supplementary material for: Promoter DNA Hypermethylation and Gene Repression in Undifferentiated Arabidopsis Cells
Source: PubMed Central journal article supplement (PMC2556100; doi:10.1371/journal.pone.0003306), 2008-10-01
Supplement: pone.0003306.s008.pdf [file pone.0003306.s008.pdf]

## Bisulfite sequencing

| <i>Gene</i>         | <i>Gene ID</i> | <i>5' primer</i>           | <i>3' primer</i>           | <i>T<sub>m</sub> (°C)</i> |
|---------------------|----------------|----------------------------|----------------------------|---------------------------|
| <i>AGL20</i>        | At2g45660      | tgaagttttttgTTTTGTTTT      | aaacaaaaaaaaacaaacacatc    | 58                        |
| <i>ANACO41</i>      | At2g33480      | aaaaaaaaatttatgaggttttg    | cctctrttttaataaaaactcctct  | 55                        |
| <i>AP2</i>          | At2g23340      | gtgaatttttaattttgTTTTT     | cctaaccaratccttaatctct     | 55                        |
| <i>ARK3</i>         | At4g21380      | ttattgaaaaggaaagaaagt      | aaaccaaattttttattttcact    | 56                        |
| <i>ATGLR2.5</i>     | At5g11210      | tgaattggttatttttttaaaat    | aaacaatccttatcttaaaacca    | 56                        |
| <i>ATINT4</i>       | At4g16480      | agggagggttttttttatttt      | cattttattcctttccatttaa     | 56                        |
| <i>BD</i>           | At1g58025      | tagtttttgggtgtyaggag       | taaattcaaattcactattctcacac | 58                        |
| <i>BRCT</i>         | At4g21070      | gagatgagagtttytggtttg      | caaacaccaatctttacacaaac    | 59                        |
| <i>BT2</i>          | At3g48360      | tttttgatgatttatggaag       | aaaaaaaaaaactttaacacatttc  | 56                        |
| <i>BXL1</i>         | At5g49360      | tagtttggttaaaagttattggt    | attaaaattctcctctttccat     | 55                        |
| <i>BZO2H3</i>       | At5g28770      | tgtttgataatttgaaattaa      | cacaaacaaaattaaattactctta  | 58                        |
| <i>CACTA(1)</i>     | At1g43840      | ggagaatatttatgtatggtataggt | aaactatcaaaaaactcatcca     | 56                        |
| <i>CACTA(2)</i>     | At2g13160      | gtgggaatatttyaggggttaa     | aacttaacctaccataaaattccc   | 60                        |
| <i>CACTA(3)</i>     | At2g12980      | gattttattgtagatygttttagg   | ccaraactaacaacaactcttc     | 56                        |
| <i>CCD7</i>         | At2g44990      | aaaaatgttgataaaatgttttt    | ctaaaaataaacrrtaaacca      | 56                        |
| <i>CCR4</i>         | At3g44260      | caaatcataaaccaaagcttcta    | aaattaaactccarataaatctc    | 58                        |
| <i>CLV1</i>         | At1g08590      | gaactactgctatcatacaaattg   | taaaaaccaacaaaatctcttattc  | 57                        |
| <i>CYC1</i>         | At4g37490      | atagttaataaaaagaataagtggtt | ttaatattctctctcttctctca    | 55                        |
| <i>DC1</i>          | At2g44370      | tgattttgaattttaaagagaa     | aacaaataatctctcttcaactta   | 55                        |
| <i>DL1D</i>         | At2g44590      | tggttttggttaattatattgaa    | aaaattatctarttaaaacaaaacct | 54                        |
| <i>EDA28</i>        | At2g34790      | tgtttaagggatataygtttatttt  | tcaaactcctcttaaacaaaataa   | 56                        |
| <i>eIF5A</i>        | At1g69410      | ttgttttttaattttgttttg      | aaatttcaraaaaaaaaatattcttc | 55                        |
| <i>ERF2</i>         | At5g47220      | gttattttgatttttttattgtgat  | ctcctcctcctcctaacaata      | 58                        |
| <i>Fbox</i>         | At2g02300      | gaattattagatagatagagaagt   | tccaacaaccacaaaatt         | 56                        |
| <i>Fimbrin</i>      | At2g04750      | ttggtgtttttgtytgatt        | ttggtgtttttgtytgatt        | 56                        |
| <i>GERMIN</i>       | At1g18980      | ttttttttgtgatygtgt         | aaaccaatcctctaaaaaac       | 56                        |
| <i>GSTF5</i>        | At1g02940      | ttttgtgttatggtttgaatatt    | tctttattccatcccattaattaata | 54                        |
| <i>GSTF7</i>        | At1g02930      | ataataagagatattaagtttggtg  | aaaaactctttcttatattacca    | 56                        |
| <i>GSTU10</i>       | At1g74590      | ggaatattaaagtttgattttg     | ctrattcccatcataaaca        | 56                        |
| <i>GTP</i>          | At5g54840      | tgagtttgtaagttaaaga        | aaaaataatctcccratttaacaa   | 56                        |
| <i>HAP3</i>         | At4g14540      | gttattaagtttttttttttt      | taattatcttctctctctctct     | 55                        |
| <i>HSP81</i>        | At5g52640      | gatgtaagtgttttgaatgatt     | tcttctttaaaataaaaaaaaaacca | 58                        |
| <i>LEA1</i>         | At1g32560      | agttatagtttgaggattttg      | ccaataaatcacattaattcc      | 55                        |
| <i>Leucine-rich</i> | At1g07390      | gatgtgtaagygtgtggaaa       | caaacaaattaataaaccaattc    | 56                        |
| <i>MAPK12</i>       | At2g46070      | tggaagaattaagtytggtt       | aatcaaaaaactaccaracaa      | 56                        |
| <i>MTase</i>        | At4g33110      | atTTTTTTGGTatagtaaatgg     | ttatctctaaatTTTTTTCCCT     | 55                        |
| <i>MtN21</i>        | At4g28040      | agggttaattttatttttgaa      | ttcttacaataaatcttaaacca    | 55                        |
| <i>PEX11</i>        | At3g47430      | aaatTTTTTTTattttaagtttga   | tctcttaacaaaaacacca        | 56                        |
| <i>PLL4</i>         | At2g28890      | ataaaagaagtttgatttaataat   | aaaaaaaaaaaaattTTTTTTact   | 55                        |
| <i>PsbQ</i>         | At3g01440      | gatttttttagatyagagagagaga  | tatacttcttacttttctctcac    | 58                        |
| <i>RPT2</i>         | At2g30520      | agttattataaaaagttggtgaaa   | aaatttcttaacataaatcccc     | 56                        |
| <i>SEN1</i>         | At4g35770      | agttattgttttaattgggtt      | cartaattccattttcacttc      | 56                        |
| <i>toIB</i>         | At4g01870      | atattggttggtgaaaattag      | taataccttataaaattccattatc  | 55                        |
| <i>Trehalose</i>    | At5g65140      | agaaagggtattttatataaagagaa | aaataataaaaaaataaaaccaaac  | 56                        |
| <i>TTG1-s1</i>      | At5g24520      | ggaagtttttygaagattataataa  | atcttcrtaatttccccaaaaac    | 56                        |

|                |           |                           |                           |    |
|----------------|-----------|---------------------------|---------------------------|----|
| <i>TTG1-s2</i> | At5g24520 | tgattaattyagagggtttatatta | ttattataatcttcraaaaaactcc | 54 |
| <i>TTG1-s3</i> | At5g24520 | tatttattgtaaggtggagtga    | acaaaccaaactccatacat      | 56 |
| <i>SUVH8</i>   | At2g24740 | aatgttattgatgatggagat     | ctcattaactcataaaatacttctc | 56 |
| <i>UDP</i>     | At2g43820 | gatatgtaaattggtttgttttt   | aaacccccataatcataacc      | 58 |

#### ChIP

| <i>Gene</i>  | <i>Gene ID</i> | <i>5' primer</i>       | <i>3' primer</i>     | <i>T<sub>m</sub> (°C)</i> |
|--------------|----------------|------------------------|----------------------|---------------------------|
| <i>ACTIN</i> | At5g09810      | ctccattcccttctccttc    | cgaggacgaccacaataact | 63                        |
| <i>GSTF5</i> | At1g02940      | tcatggttatgctgtccatttc | agcaagttccggtacatgg  | 63                        |
| <i>SUVH8</i> | At2g24740      | ccacgcaacatcagtacctc   | gtactaggaccggcatctcg | 63                        |
| <i>TTG1</i>  | At5g24520      | tctacgccatggctttctct   | gagatctccggaggaaggac | 63                        |

#### RT-PCR

| <i>Gene</i>  | <i>Gene ID</i> | <i>5' primer</i>     | <i>3' primer</i>     | <i>T<sub>m</sub> (°C)</i> |
|--------------|----------------|----------------------|----------------------|---------------------------|
| <i>ACTIN</i> | At5g09810      | ctccattcccttctccttc  | cgaggacgaccacaataact | 60                        |
| <i>GSTF5</i> | At1g02940      | tgaccagaagaagccgagtt | cccaggctcagttgtatgtg | 60                        |
| <i>SUVH8</i> | At2g24740      | tgatgatggagatgctggtc | accattttcgaacccttt   | 60                        |
| <i>TTG1</i>  | At5g24520      | ctcggttctcaacaacagca | cgcacatgacgattatacgg | 60                        |

#### Q-PCR

| <i>Gene</i>    | <i>Gene ID</i> | <i>5' primer</i>     | <i>3' primer</i>     | <i>T<sub>m</sub> (°C)</i> |
|----------------|----------------|----------------------|----------------------|---------------------------|
| <i>ACTIN</i>   | At5g09810      | tacaacgagctcgtgttgc  | tacatggcagggacattgaa | 60                        |
| <i>BXL1</i>    | At5g49360      | ggagcccttgtaaaatgctg | atgaaaacgccattgtctc  | 60                        |
| <i>CCD7</i>    | At2g44990      | acagccgcagattgttga   | cgaccgtcgactttgtaatg | 60                        |
| <i>Fimbrin</i> | At2g04750      | gccaatcacacaagtggag  | tcacagtgcacgaccgaat  | 60                        |
| <i>GSTF5</i>   | At1g02940      | tgaccagaagaagccgagtt | aagacccccgtctaggaaaa | 60                        |
| <i>GSTU10</i>  | At1g74590      | cggaggctacaaagctcatc | gatcttgcaggcgctctatc | 60                        |
| <i>MAPK12</i>  | At2g46070      | gcgatacccgaacaacagt  | tcatggtgcggtgataggta | 60                        |
| <i>SUVH8</i>   | At2g24740      | gtcgggctcacagaaacac  | actcgtagcagcaggaccat | 60                        |
| <i>TTG1</i>    | At5g24520      | ctctacgccatggctttctc | atgtcgatgcggtgttgtga | 60                        |

**Table S1.** Primer sequences and annealing temperatures ( $T_m$ ) for bisulfite sequencing, chromatin immunoprecipitation (ChIP) RT-PCR and Q-PCR reactions.
