# Supplementary material for: Promoter DNA Hypermethylation and Gene Repression in Undifferentiated Arabidopsis Cells
Source: PubMed Central journal article supplement (PMC2556100; doi:10.1371/journal.pone.0003306), 2008-10-01
Supplement: pone.0003306.s009.pdf [file pone.0003306.s009.pdf]

| Probe Set ID | Gene Title                                                               | Representative Public ID | Genes selected for mutant: |
|--------------|--------------------------------------------------------------------------|--------------------------|----------------------------|
| 247228_at    | trehalose-6-phosphate phosphatase, putative                              | At5g65140                | CMT3                       |
| 252411_at    | peroxisomal biogenesis factor 11 family protein / PEX11 family protein   | At3g47430                | DRM2                       |
| 266600_at    | mitogen-activated protein kinase, putative / MAPK, putative (MPK12)      | At2g46070                | DRM2                       |
| 245592_at    | CCAAT-box binding transcription factor subunit B (NF-YB) (HAP3)          | At4g14540                | DRM2                       |
| 267509_at    | MADS-box protein (AGL20)                                                 | At2g45660                | DRM2                       |
| 245499_at    | sugar transporter family protein (ATINT4)                                | At4g16480                | DRM2                       |
| 248622_at    | glycosyl hydrolase family 3 protein(BXL1)                                | At5g49360                | DRM2                       |
| 253829_at    | nodulin MtN21 family protein                                             | At4g28040                | DRM2                       |
| 256464_at    | late embryogenesis abundant group 1 domain-containing protein (LEA1)     | At1g32560                | DRM2                       |
| 253161_at    | senescence-associated protein (SEN1)                                     | At4g35770                | DRM2                       |
| 250415_at    | glutamate receptor family protein (GLR2.5)                               | At5g11210                | MET1                       |
| 260350_at    | eukaryotic translation initiation factor 5A, putative / eIF-5A, putative | At1g69410                | MET1                       |
| 255543_at    | tolB protein-related                                                     | At4g01870                | MET1                       |
| 254416_at    | S-locus protein kinase, putative (ARK3)                                  | At4g21380                | MET1                       |
| 252367_at    | speckle-type POZ protein-related (BT2)                                   | At3g48360                | MET1                       |
| 253362_s_at  | cochlorine N-methyltransferase, putative                                 | At4g33110                | MET1                       |
| 267516_at    | signal transducer of phototropic response (RPT2)                         | At2g30520                | MET1                       |
| 245078_at    | AP2 domain-containing transcription factor, putative                     | At2g23340                | MET1                       |
| 248794_at    | ethylene-responsive element-binding factor 2 (ERF2)                      | At5g47220                | MET1                       |
| 257377_at    | protein phosphatase 2C family protein / PP2C family protein (PLL4)       | At2g28890                | MET1                       |
| 255794_at    | no apical meristem (NAM) family protein (ANACO41)                        | At2g33480                | MET1                       |
| 267384_at    | DC1 domain-containing protein                                            | At2g44370                | MET1                       |
| 267414_at    | FAD-binding domain-containing protein (EDA28)                            | At2g34790                | MET1                       |
| 248132_at    | GTP-binding family protein                                               | At5g54840                | MET1                       |
| 248332_at    | heat shock protein 81-1 (HSP81-1) / heat shock protein 83 (HSP83)        | At5g52640                | MET1                       |
| 260567_at    | UDP-glucuronosyl/UDP-glucosyl transferase family protein                 | At2g43820                | MET1                       |
| 247913_at    | hypothetical protein                                                     | At5g57510                | MET1                       |
| 259478_at    | germin-like protein, putative                                            | At1g18980                | MET1                       |
| 260225_at    | glutathione S-transferase, putative (GSTU10)                             | At1g74590                | MET1                       |
| 261070_at    | leucine-rich repeat family protein                                       | At1g07300                | MET1                       |
| 262119_s_at  | glutathione S-transferase, putative (GSTF7)                              | At1g02930                | MET1                       |

**Table S2.** Genetic identification of methylated genes in *Arabidopsis* callus. Candidate genes obtained by Affymetrix GeneChip technology with *met1*, *drm2* and *cmt3* mutants. Genes were selected using the criteria described in the results section.
