# Supplementary material for: Promoter DNA Hypermethylation and Gene Repression in Undifferentiated Arabidopsis Cells
Source: PubMed Central journal article supplement (PMC2556100; doi:10.1371/journal.pone.0003306), 2008-10-01
Supplement: pone.0003306.s010.pdf [file pone.0003306.s010.pdf]

| Gene ID   | Gene                                     | Process                                                             | References                                                                 |
|-----------|------------------------------------------|---------------------------------------------------------------------|----------------------------------------------------------------------------|
| At1g02930 | <i>GSTF7</i><br>( <i>ATGSTF6</i> )(**)   | Glutathione S-Transferase                                           | Moeder et al. 2007. <i>Plant Mol Biol</i> 63(2):273-287                    |
| At1g02940 | <i>GSTF5</i><br>( <i>ATGSTF5</i> )(**)   | Glutathione S-Transferase                                           | Wagner et al., 2002. <i>Plant Mol Biol</i> . 49(5):515-532.                |
| At1g07390 | <i>ATRLP1</i>                            | Signal transduction                                                 | Kobe B, Kajava AV.2001. <i>Curr Opin Struct Biol</i> 11(6):725-732.        |
| At1g08590 | <i>CLV1</i>                              | Protein amino acid phosphorylation, signaling pathway               | Duarte et al., 2006. <i>Mol. Biol. Evol.</i> 23(2):469-478.                |
| At1g18980 | <i>GERMIN</i>                            | Manganese ion binding                                               | Christensen et al. 2004. <i>Mol Plant Microbe Interact</i> 17(1): 109-117* |
| At1g32560 | <i>LEA1</i>                              | Embryonic development ending in seed dormancy                       | Hundertmark and Hincha. 2008. <i>BMC Genomics</i> 9:118.                   |
| At1g58025 | <i>BD</i>                                | DNA binding                                                         | Chua et al. 2005. <i>Genes Dev</i> 19(18): 2245-2254*                      |
| At1g69410 | <i>EIF5A</i>                             | Translational initiation                                            | Balabanov et al. 2007. <i>Blood</i> 109(4):1701-1711*.                     |
| At1g74590 | <i>GSTU10</i><br>( <i>ATGSTU10</i> )(**) | Glutathione S-Transferase                                           | Wagner et al., 2002. <i>Plant Mol Biol</i> . 49(5):515-532.                |
| At2g02300 | <i>Fbox</i><br>( <i>ATPP2-B5</i> )(**)   | Carbohydrate binding                                                | Dinant et al. 2003. <i>Plant Physiol</i> . 131(1):114-128.                 |
| At2g04750 | <i>Fimbrin</i>                           | Actin binding                                                       | Reichl et al. 2008. <i>Curr Biol</i> 18(7): 471- 480.                      |
| At2g23340 | <i>AP2</i>                               | Regulation of transcription                                         | Pre et al. 2008. <i>Plant Physiol</i> , in press.                          |
| At2g24740 | <i>SUVH8</i><br>( <i>SDG21</i> )(**)     | Regulation of gene expression, epigenetics                          | Baumbusch et al., 2001. <i>Nucleic Acids Research</i> 29(21):4319-33       |
| At2g28890 | <i>PLL4</i>                              | Leaf development                                                    | Song et al. 2005. <i>Dev Biol</i> . 285(1):272-284.                        |
| At2g30520 | <i>RPT2</i>                              | Protein binding, phototropism                                       | Inada et al. 2004. <i>Plant Cell</i> 16(4):887- 896.                       |
| At2g33480 | <i>ANACO41</i>                           | Multicellular organismal development                                | Yoo et al. 2007. <i>PLoS ONE</i> 2(7):e642.                                |
| At2g34790 | <i>EDA28</i>                             | Embryonic development ending in seed dormancy, polar nucleus fusion | Pagnussat et al. 2005. <i>Development</i> 132(3):603-614.                  |
| At2g43820 | <i>UDP</i>                               | UDP-glucosyltransferase                                             | Sepúlveda-Jiménez et al. 2005. <i>J Exp Bot</i> 56(412):605-611*.          |
| At2g44370 | <i>DC1</i>                               | Protein binding                                                     | Shinya et al. 2007. <i>Plant Cell Physiol</i> . 48(10):1404-1413*.         |
| At2g44590 | <i>DL1D</i><br>( <i>ADL1D</i> )(**)      | Growth and development                                              | Kang et al. 2003. <i>Plant Cell</i> . 15(4):899-913.                       |
| At2g44990 | <i>CCD7</i>                              | Secondary shoot formation                                           | Stirnberg et al. 2007. <i>Plant J</i> 50(1):80-94.                         |
| At2g45660 | <i>AGL20</i>                             | Positive regulation of flowering                                    | Liu et al. 2007. <i>Development</i> 134(10):1901-1910.                     |
| At2g46070 | <i>MAPK12</i><br>( <i>ATMPK12</i> )(**)  | Signal transduction                                                 | Hamel et al., 2006. <i>Trends Plant Sci</i> .11(4):192-198.                |
| At3g01440 | <i>PsbQ</i>                              | Light reaction                                                      | Zybailov et al. 2008. <i>PLoS ONE</i> 3(4):e1994                           |
| At3g44260 | <i>CCR4</i>                              | RNA modification                                                    | Prévôt et al. 2001. <i>J Biol Chem</i> 276(13): 9640-9648*                 |
| At3g47430 | <i>PEX11</i>                             | Peroxisome organization and biogenesis                              | Orth et al. 2007. <i>Plant Cell</i> 19(1):333-350.                         |
| At3g48360 | <i>BT2</i>                               | Positive regulation of telomerase activity                          | Ren et al. 2007. <i>Plant Cell</i> 19(1): 23-31.                           |
| At4g01870 | <i>tolB</i>                              | Translocation domain                                                | Mueller et al. 2008. <i>Plant Cell</i> 20: 768-785*                        |

|           |                                        |                                           |                                                                      |
|-----------|----------------------------------------|-------------------------------------------|----------------------------------------------------------------------|
| At4g14540 | <i>HAP3</i>                            | Regulation of transcription               | Lee et al. 2003. Proc Natl Acad Sci U S A. 100(4):2152-2156.         |
| At4g16480 | <i>ATINT4</i>                          | Carbohydrate transport                    | Schneider et al. Plant Physiol 145(4):1395-1407.                     |
| At4g21070 | <i>BRCT</i><br>( <i>ATBRCA1</i> ) (**) | DNA repair                                | Reidt et al., 2006.EMBO J. 25(18):4326-4337.                         |
| At4g21380 | <i>ARK3</i>                            | Protein amino acid phosphorylation        | Pastuglia et al. 2002. Gene 282(1-2): 215-225.                       |
| At4g28040 | <i>MtN21</i>                           | Amino acid transport                      | Busov et al. 2004. Planta 218(6):916-927*.                           |
| At4g33110 | <i>Mtase</i>                           | N-methyltransferase                       | Liscombe and Facchini. 2007. J Biol Chem 282(20):14741-14751*.       |
| At4g35770 | <i>SEN1</i>                            | Aging                                     | Schenk et al. 2005. Plant Physiol Biochem 43(10-11): 997-1005.       |
| At4g37490 | <i>CYC1</i>                            | Regulation of cell growth and cell cycle  | Kirik et al., 2007. Plant Cell. 19(10):3100-3110.                    |
| At5g11210 | <i>AGLR2.5</i>                         | Response to light stimulus                | Shin et al. 2008. Neuropharmacology, in press.                       |
| At5g24520 | <i>TTG1</i>                            | Cell fate and differentiation             | Bouyer et al., 2008. PLoS Biol. 6: e141.                             |
| At5g28770 | <i>BZO2H3</i>                          | Regulation of transcription               | Jakoby et al. 2002. Trends Plant Sci 7(3):106-111.                   |
| At5g47220 | <i>ERF2</i>                            | Positive regulation of transcription      | Nakano et al. 2006. Plant Physiol. 140(2):411-432.                   |
| At5g49360 | <i>BXL1</i>                            | Secondary wall thickening                 | Zybailov et al. 2008. PLoS ONE 3(4):e1994.                           |
| At5g52640 | <i>HSP81</i>                           | Heat shock                                | Takahashi et al. 2003. Proc Natl Acad Sci U S A.100(20):11777-11782. |
| At5g54840 | <i>GTP</i>                             | Small GTPase mediated signal transduction | Weirich et al. 2008. Nat Rev Mol Cell Biol 9(6):478-489*.            |
| At5g65140 | <i>trehalose</i>                       | trehalose biosynthetic process            | Chary et al. 2008. Plant Physiol 146(1): 97-107                      |

**Table S3.** List of candidate genes selected for the validation with the bisulfite sequencing analysis. Genes were obtained from both the pharmacological and genetic approaches. Then, we selected candidates attending to their functional role as described in the literature.

\* *member of the same family.*

\*\**nomenclature from genome annotation: Build 7.0.*

### References Table S3

1. Balabanov S, Gontarewicz A, Ziegler P, Hartmann U, Kammer W, et al. (2007) Hypusination of eukaryotic initiation factor 5A (eIF5A): a novel therapeutic target in BCR-ABL-positive leukemias identified by a proteomics approach. Blood 109: 1701-1711.
2. Baumbusch LO, Thorstensen T, Krauss V, Fischer A, Naumann K, et al. (2001) The Arabidopsis thaliana genome contains at least 29 active genes encoding SET domain proteins that can be assigned to four evolutionarily conserved classes. Nucleic Acids Res 29: 4319-4333.
3. Bouyer D, Geier F, Kragler F, Schnittger A, Pesch M, et al. (2008) Two-dimensional patterning by a trapping/depletion mechanism: the role of TTG1 and GL3 in Arabidopsis trichome formation. PLoS Biol 6: e141.
4. Busov VB, Johannes E, Whetten RW, Sederoff RR, Spiker SL, et al. (2004) An auxin-inducible gene from loblolly pine (*Pinus taeda* L.) is differentially expressed in mature and juvenile-phase shoots and encodes a putative transmembrane protein. Planta 218: 916-927.

5. Chary SN, Hicks GR, Choi YG, Carter D, Raikhel NV (2008) Trehalose-6-phosphate synthase/phosphatase regulates cell shape and plant architecture in Arabidopsis. *Plant Physiol* 146: 97-107.
6. Christensen AB, Thordal-Christensen H, Zimmermann G, Gjetting T, Lyngkjaer MF, et al. (2004) The germinlike protein GLP4 exhibits superoxide dismutase activity and is an important component of quantitative resistance in wheat and barley. *Mol Plant Microbe Interact* 17: 109-117.
7. Chua YL, Channeliere S, Mott E, Gray JC (2005) The bromodomain protein GTE6 controls leaf development in Arabidopsis by histone acetylation at ASYMMETRIC LEAVES1. *Genes Dev* 19: 2245-2254.
8. Dinant S, Clark AM, Zhu Y, Vilaine F, Palauqui JC, et al. (2003) Diversity of the superfamily of phloem lectins (phloem protein 2) in angiosperms. *Plant Physiol* 131: 114-128.
9. Duarte JM, Cui L, Wall PK, Zhang Q, Zhang X, et al. (2006) Expression pattern shifts following duplication indicative of subfunctionalization and neofunctionalization in regulatory genes of Arabidopsis. *Mol Biol Evol* 23: 469-478.
10. Hamel LP, Nicole MC, Sritubtim S, Morency MJ, Ellis M, et al. (2006) Ancient signals: comparative genomics of plant MAPK and MAPKK gene families. *Trends Plant Sci* 11: 192-198.
11. Hundertmark M, Hincha DK (2008) LEA (late embryogenesis abundant) proteins and their encoding genes in Arabidopsis thaliana. *BMC Genomics* 9: 118.
12. Inada S, Ohgishi M, Mayama T, Okada K, Sakai T (2004) RPT2 is a signal transducer involved in phototropic response and stomatal opening by association with phototropin 1 in Arabidopsis thaliana. *Plant Cell* 16: 887-896.
13. Jakoby M, Weisshaar B, Droge-Laser W, Vicente-Carbajosa J, Tiedemann J, et al. (2002) bZIP transcription factors in Arabidopsis. *Trends Plant Sci* 7: 106-111.
14. Kang BH, Busse JS, Bednarek SY (2003) Members of the Arabidopsis dynamin-like gene family, ADL1, are essential for plant cytokinesis and polarized cell growth. *Plant Cell* 15: 899-913.
15. Kirik V, Schrader A, Uhrig JF, Hulskamp M (2007) MIDGET unravels functions of the Arabidopsis topoisomerase VI complex in DNA endoreduplication, chromatin condensation, and transcriptional silencing. *Plant Cell* 19: 3100-3110.
16. Kobe B, Kajava AV (2001) The leucine-rich repeat as a protein recognition motif. *Curr Opin Struct Biol* 11: 725-732.
17. Lee H, Fischer RL, Goldberg RB, Harada JJ (2003) Arabidopsis LEAFY COTYLEDON1 represents a functionally specialized subunit of the CCAAT binding transcription factor. *Proc Natl Acad Sci U S A* 100: 2152-2156.
18. Liscombe DK, Facchini PJ (2007) Molecular cloning and characterization of tetrahydroprotoberberine cis-N-methyltransferase, an enzyme involved in alkaloid biosynthesis in opium poppy. *J Biol Chem* 282: 14741-14751.
19. Liu C, Zhou J, Bracha-Drori K, Yalovsky S, Ito T, et al. (2007) Specification of Arabidopsis floral meristem identity by repression of flowering time genes. *Development* 134: 1901-1910.
20. Moeder W, Del Pozo O, Navarre DA, Martin GB, Klessig DF (2007) Aconitase plays a role in regulating resistance to oxidative stress and cell death in Arabidopsis and Nicotiana benthamiana. *Plant Mol Biol* 63: 273-287.
21. Mueller S, Hilbert B, Dueckershoff K, Roitsch T, Krischke M, et al. (2008) General detoxification and stress responses are mediated by oxidized lipids through TGA transcription factors in Arabidopsis. *Plant Cell* 20: 768-785.
22. Nakano T, Suzuki K, Fujimura T, Shinshi H (2006) Genome-wide analysis of the ERF gene family in Arabidopsis and rice. *Plant Physiol* 140: 411-432.
23. Orth T, Reumann S, Zhang X, Fan J, Wenzel D, et al. (2007) The PEROXIN11 protein family controls peroxisome proliferation in Arabidopsis. *Plant Cell* 19: 333-350.
24. Pastuglia M, Swarup R, Rocher A, Saindrenan P, Roby D, et al. (2002) Comparison of the expression patterns of two small gene families of S gene family receptor kinase genes during the defence response in Brassica oleracea and Arabidopsis thaliana. *Gene* 282: 215-225.
25. Pre M, Atallah M, Champion A, De Vos M, Pieterse CM, et al. (2008) The AP2/ERF-domain transcription factor ORA59 integrates jasmonic acid and ethylene signals in plant defense. *Plant Physiol*.

26. Prevot D, Morel AP, Voeltzel T, Rostan MC, Rimokh R, et al. (2001) Relationships of the antiproliferative proteins BTG1 and BTG2 with CAF1, the human homolog of a component of the yeast CCR4 transcriptional complex: involvement in estrogen receptor alpha signaling pathway. *J Biol Chem* 276: 9640-9648.
27. Reichl EM, Ren Y, Morphew MK, Delannoy M, Effler JC, et al. (2008) Interactions between myosin and actin crosslinkers control cytokinesis contractility dynamics and mechanics. *Curr Biol* 18: 471-480.
28. Reidt W, Wurz R, Wanieck K, Chu HH, Puchta H (2006) A homologue of the breast cancer-associated gene BARD1 is involved in DNA repair in plants. *Embo J* 25: 4326-4337.
29. Ren S, Mandadi KK, Boedeker AL, Rathore KS, McKnight TD (2007) Regulation of telomerase in Arabidopsis by BT2, an apparent target of TELOMERASE ACTIVATOR1. *Plant Cell* 19: 23-31.
30. Schenk PM, Kazan K, Rusu AG, Manners JM, Maclean DJ (2005) The SEN1 gene of Arabidopsis is regulated by signals that link plant defence responses and senescence. *Plant Physiol Biochem* 43: 997-1005.
31. Schneider S, Schneidereit A, Udvardi P, Hammes U, Gramann M, et al. (2007) Arabidopsis INOSITOL TRANSPORTER2 mediates H<sup>+</sup> symport of different inositol epimers and derivatives across the plasma membrane. *Plant Physiol* 145: 1395-1407.
32. Shin SS, Martino JJ, Chen S (2008) Metabotropic glutamate receptors (mGlu) and cellular transformation. *Neuropharmacology*.
33. Shinya T, Galis I, Narisawa T, Sasaki M, Fukuda H, et al. (2007) Comprehensive analysis of glucan elicitor-regulated gene expression in tobacco BY-2 cells reveals a novel MYB transcription factor involved in the regulation of phenylpropanoid metabolism. *Plant Cell Physiol* 48: 1404-1413.
34. Song SK, Clark SE (2005) POL and related phosphatases are dosage-sensitive regulators of meristem and organ development in Arabidopsis. *Dev Biol* 285: 272-284.
35. Stirnberg P, van De Sande K, Leyser HM (2002) MAX1 and MAX2 control shoot lateral branching in Arabidopsis. *Development* 129: 1131-1141.
36. Takahashi A, Casais C, Ichimura K, Shirasu K (2003) HSP90 interacts with RAR1 and SGT1 and is essential for RPS2-mediated disease resistance in Arabidopsis. *Proc Natl Acad Sci U S A* 100: 11777-11782.
37. Wagner U, Edwards R, Dixon DP, Mauch F (2002) Probing the diversity of the Arabidopsis glutathione S-transferase gene family. *Plant Mol Biol* 49: 515-532.
38. Weirich CS, Erzberger JP, Barral Y (2008) The septin family of GTPases: architecture and dynamics. *Nat Rev Mol Cell Biol* 9: 478-489.
39. Yoo SY, Kim Y, Kim SY, Lee JS, Ahn JH (2007) Control of flowering time and cold response by a NAC-domain protein in Arabidopsis. *PLoS ONE* 2: e642.
40. Zybailov B, Rutschow H, Friso G, Rudella A, Emanuelsson O, et al. (2008) Sorting signals, N-terminal modifications and abundance of the chloroplast proteome. *PLoS ONE* 3: e1994.
