# Supplementary material for: Promoter DNA Hypermethylation and Gene Repression in Undifferentiated Arabidopsis Cells
Source: PubMed Central journal article supplement (PMC2556100; doi:10.1371/journal.pone.0003306), 2008-10-01
Supplement: pone.0003306.s011.pdf [file pone.0003306.s011.pdf]

| Probe Set ID | Representative Public ID | Gene Title                                                                                   | MEAN WT | MEAN ADC | MEAN FC     |
|--------------|--------------------------|----------------------------------------------------------------------------------------------|---------|----------|-------------|
| 258956_at    | At3g01440                | oxygen evolving enhancer 3 (PsbQ) family protein                                             | 1       | 24.2     | 24.2        |
| 245865_at    | At1g58025                | DNA-binding bromodomain-containing protein                                                   | 6.2     | 67.55    | 10.89516129 |
| 249739_at    | At5g24520                | transparent testa glabra 1 protein (TTG1)                                                    | 7.15    | 56.95    | 7.965034965 |
| 266179_at    | At2g02300                | F-box family protein / SKP1 interacting partner 3-related                                    | 4.45    | 26.1     | 5.865168539 |
| 264804_at    | At1g08590                | CLAVATA1 receptor kinase (CLV1)                                                              | 10      | 28.4     | 2.84        |
| 266879_at    | At2g44590                | dynammin-like protein D (DL1D)                                                               | 12.1    | 31.6     | 2.611570248 |
| 252679_at    | At3g44260                | CCR4-NOT transcription complex protein, putative                                             | 185.9   | 484.5    | 2.606239914 |
| 254443_at    | At4g21070                | BRCT domain-containing protein / zinc finger (C3HC4-type RING finger) family protein (BRCA1) | 67.05   | 167.45   | 2.497390007 |
| 262103_at    | At1g02940                | glutathione S-transferase, putative                                                          | 8.5     | 18.45    | 2.170588235 |
| 263317_s_at  | At2g24740                | SET domain-containing protein (SUVH7/SUVH8)                                                  | 146.15  | 301      | 2.059527882 |
| 253051_at    | At4g37490                | G2/mitotic-specific cyclin (CYC1) / B-like cyclin (CYC1)                                     | 263.75  | 531.2    | 2.014028436 |
| 245925_at    | At5g28770                | bZIP transcription factor family protein                                                     | 23.1    | 61.6     | 2.666666667 |
| 263642_at    | At2g04750                | fimbrin                                                                                      | 8.65    | 23.1     | 2.670520231 |
| 266129_at    | At2g44990                | more axillary growth 3 (CCD7)                                                                | 13.05   | 28.55    | 2.187739464 |

**Table S4.** List of *Arabidopsis thaliana* candidate genes obtained with the pharmacologic approach (treatment of *Arabidopsis* cell suspensions with the demethylating drug ADC). The genes were selected according to the two-step criteria described in the results section.
