# Supplementary material for: Promoter DNA Hypermethylation and Gene Repression in Undifferentiated Arabidopsis Cells
Source: PubMed Central journal article supplement (PMC2556100; doi:10.1371/journal.pone.0003306), 2008-10-01
Supplement: pone.0003306.s012.pdf [file pone.0003306.s012.pdf]

| Sequence type | Locus         | Fragment length (bp) | <sup>m</sup> CG |               | <sup>m</sup> CCG |            | <sup>m</sup> CAG |      | <sup>m</sup> CTG |              |      |   |      |      |
|---------------|---------------|----------------------|-----------------|---------------|------------------|------------|------------------|------|------------------|--------------|------|---|------|------|
|               |               |                      | N° targets      | % methylated* |                  | N° targets | % methylated     |      | N° targets       | % methylated |      |   |      |      |
|               |               |                      |                 | Leaf          | ACS              |            | Leaf             | ACS  |                  | Leaf         | ACS  |   |      |      |
| Promoters     | <i>TTG1</i>   | 213                  | 16              | 2.1           | 92.2             | 8          | 0                | 0    | 1                | 0            | 0    | 0 | 0    | 0    |
|               | <i>GSTF5</i>  | 304                  | 8               | 1.04          | 55.2             | 1          | 0                | 0    | 1                | 0            | 0    | 1 | 0    | 0    |
|               | <i>SUVH8</i>  | 371                  | 9               | 3.70          | 56.5             | 7          | 0                | 0    | 4                | 0            | 0    | 7 | 0    | 0    |
| Repeats       | <i>CACTA1</i> | 159                  | 5               | 73.1          | 68.3             | 1          | 66.6             | 0    | 3                | 66.6         | 66.6 | 6 | 65.2 | 62.5 |
|               | <i>CACTA2</i> | 170                  | 8               | 90.0          | 83.3             | 2          | 33.3             | 18.8 | 3                | 38.8         | 33.3 | 7 | 64.3 | 37.1 |
|               | <i>CACTA3</i> | 263                  | 11              | 98.5          | 63.6             | 2          | 75.0             | 0    | 6                | 38.4         | 8.3  | 4 | 77.8 | 16.6 |

**Table S5.** Sequence context of the DNA methylation found in *Arabidopsis* cell suspensions and leaves. Data obtained from bisulfite sequencing of 12 individual clones per sequence and sample.
